# Supplementary material
Source: PubMed Central journal article supplement (PMC7098729)
Supplement: jciinsight-5-133501-s064.pdf [file jciinsight-5-133501-s064.pdf]

# Supplementary Fig. S1

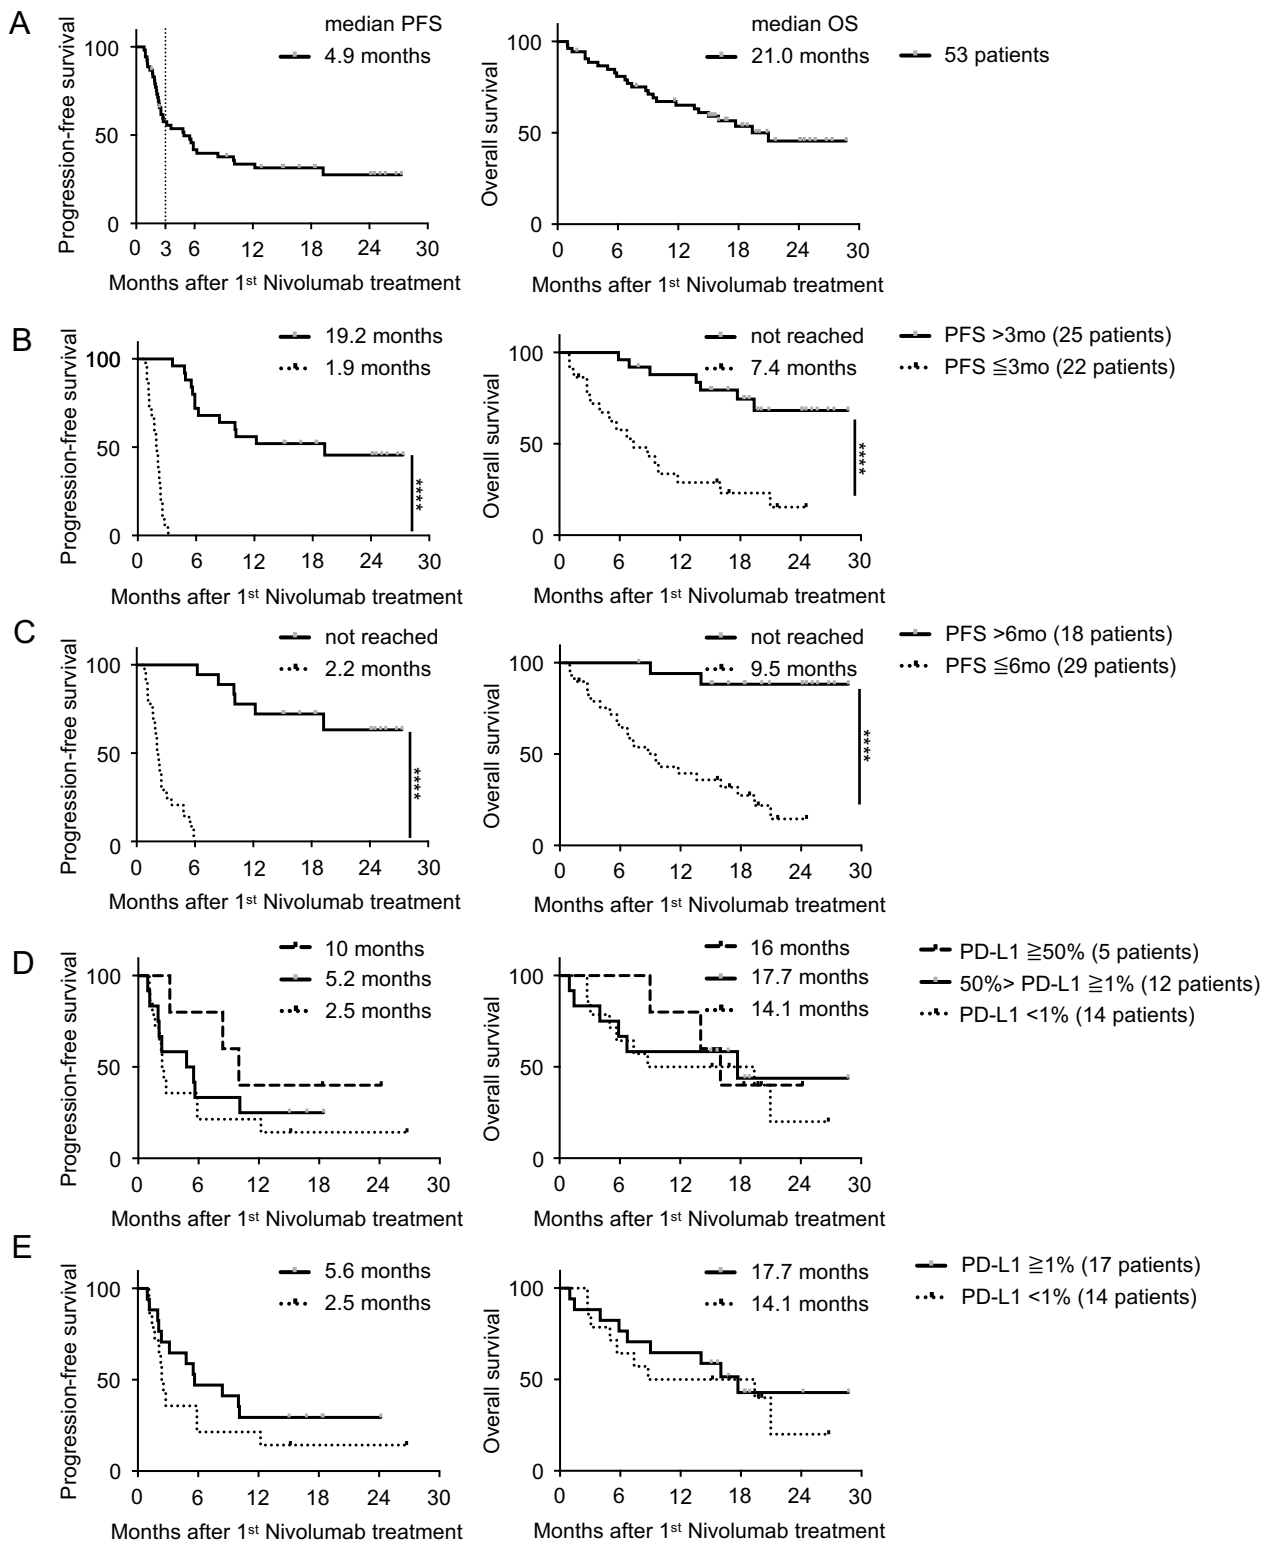

**Supplementary Fig. S1. Survival rates are compared between sorted groups based on different criteria.** **A)** Kaplan–Meier plots of PFS and OS of all patients enrolled in this study. **B)** Kaplan–Meier plots of PFS and OS of patients sorted by the criteria of PFS > 3 months (solid line) and PFS ≤ 3 months (dotted line). **C)** The solid line and dotted line show patients with PFS > 6 months and PFS ≤ 6 months, respectively. \*\*\*\**p* < 0.0001 by Log-rank test. **D)** Kaplan–Meier plots of PFS and OS of patients sorted by frequency of PD-L1 expression on tumors. The dashed line, solid line, and dotted line show patients with high PD-L1 expression (greater than 50%), low PD-L1 expression (1–50%), and rare PD-L1 expression (less than 1%), respectively. **E)** The solid line and dotted line show patients with positive expression (greater than 1%) and negative expression (less than 1%) of PD-L1, respectively.

# Supplementary Fig. S2

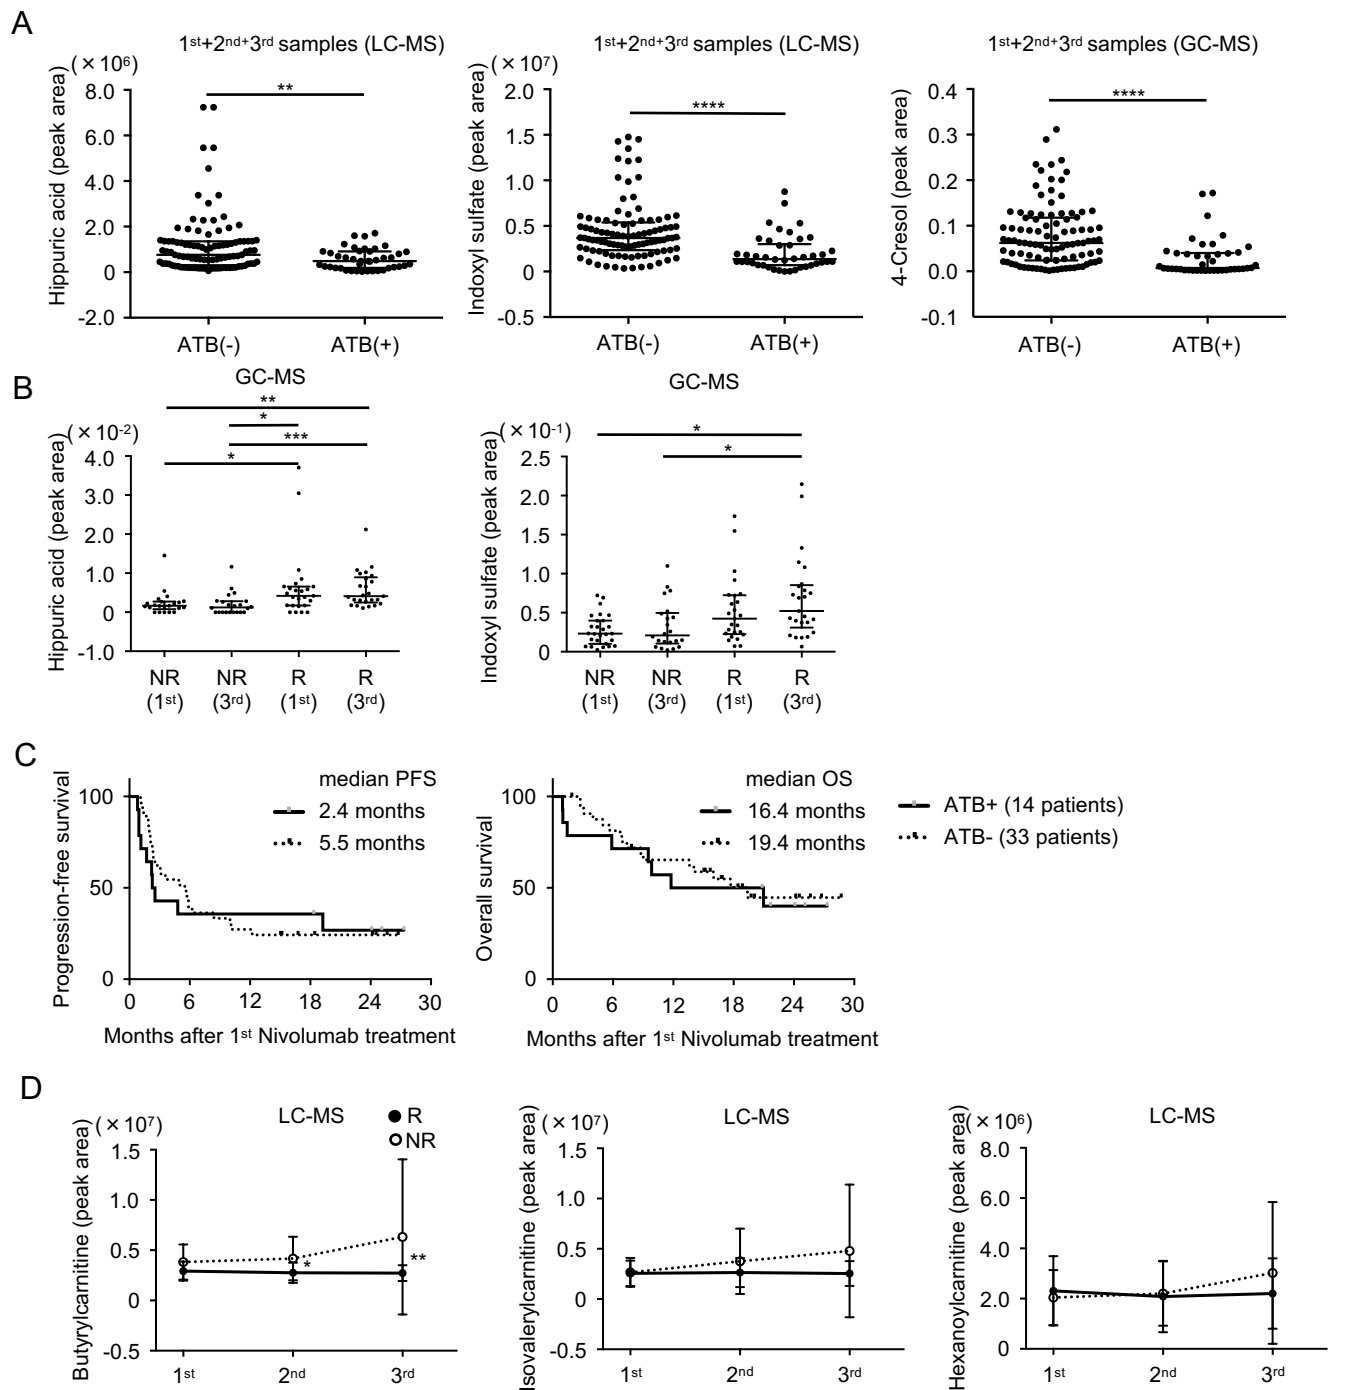

## Supplementary Fig. S2. Behaviors of microbiota-derived metabolites and acylcarnitine species.

**A**) The peak area measured by GC- or LC-MS of each microbiome related metabolites in patients without pre-antibiotics treatment (ATB(-)) and with pre-antibiotics treatment (ATB(+)) are shown. These graphs display the data of the 1<sup>st</sup> + 2<sup>nd</sup> + 3<sup>rd</sup> samples. \*\* $p < 0.01$ , \*\*\*\* $p < 0.0001$  by Wilcoxon rank sum test. **B**) The peak areas measured by GC-MS of hippuric acid and indoxyl sulfate in non-responders (NR) and responders (R) are shown. Each dot represents one patient. Error bars show median and interquartile range. \* $p < 0.05$ , \*\* $p < 0.01$ , \*\*\* $p < 0.001$  by Kruskal–Wallis test followed by Dunn’s multiple comparisons test. **C**) Kaplan–Meier plots of PFS and OS of patients with (solid line) and without ATB (dotted line) within 3 months prior to the first nivolumab injection. **D**) The peak area detected by LC-MS of acylcarnitines between 1<sup>st</sup>, 2<sup>nd</sup> and 3<sup>rd</sup> samples are shown. The solid line and dotted line represent responders and non-responders, respectively. \* $p < 0.05$ , \*\* $p < 0.01$  by Wilcoxon rank sum test.

# Supplementary Fig. S3

A

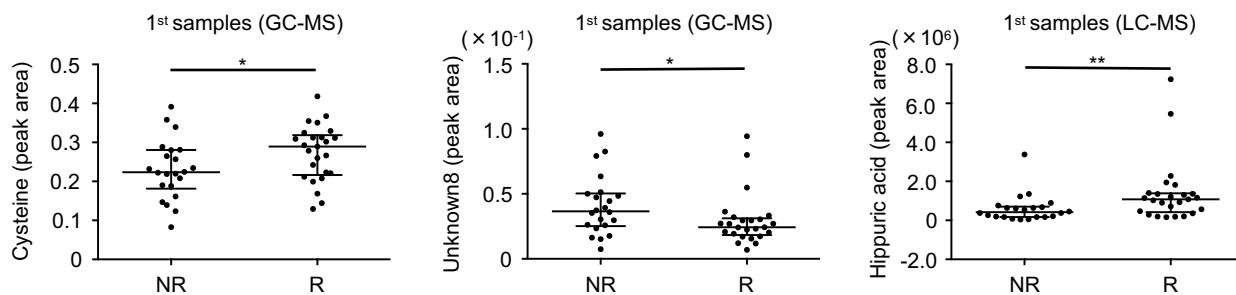

B

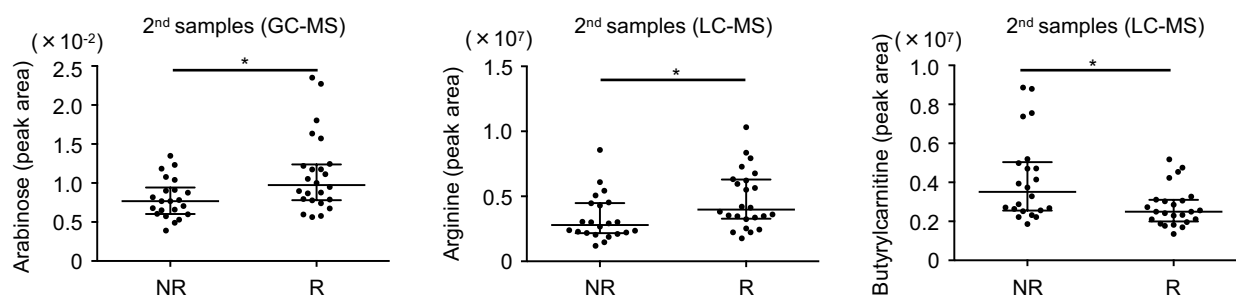

C

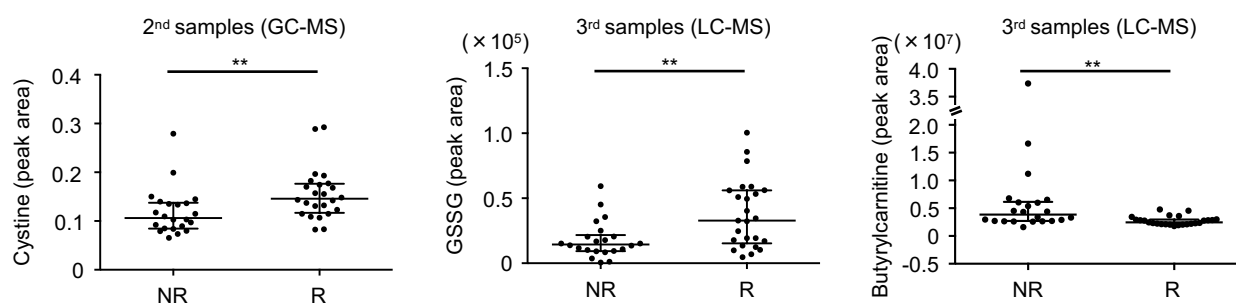

## Supplementary Fig. S3. Detailed data of metabolite markers selected by stepwise analysis.

A–C) Graphs show comparison of peak areas of metabolic markers selected by stepwise analysis between non-responders and responders. Each dot represents one patient. Error bars indicate the median and interquartile range. \* $p < 0.05$ , \*\* $p < 0.01$  by Wilcoxon rank sum test.

# Supplementary Fig. S4

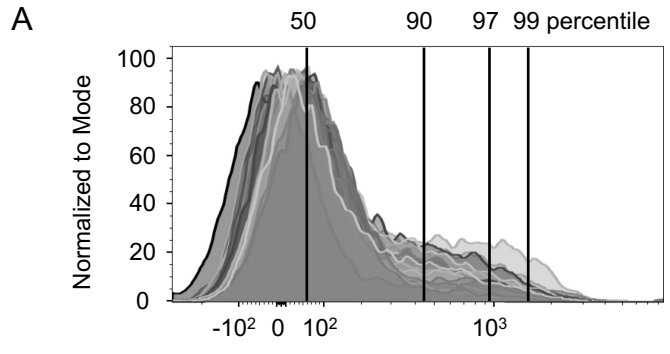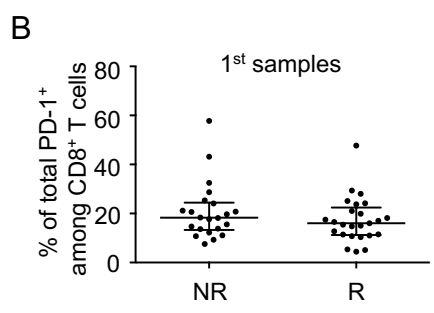

| PD-1 <sup>high</sup> cut-off | CTLA-4      | Tim-3       | Lag-3       |
|------------------------------|-------------|-------------|-------------|
| 90 percentile                | *0.59       | 0.73        | 0.53        |
| <b>97 percentile</b>         | <b>0.65</b> | <b>0.76</b> | <b>0.53</b> |
| 99 percentile                | 0.63        | 0.69        | 0.47        |

\* r values by Pearson

**Supplementary Fig. S4. Definition of PD-1<sup>high</sup>.** **A)** Overlay histograms of PD-1 intensity gated on CD8<sup>+</sup> T cells from age-matched 30 healthy donors. Lines show the 50<sup>th</sup>, 90<sup>th</sup>, 97<sup>th</sup>, and 99<sup>th</sup> percentile of PD-1 intensity averaged with the donors. The correlation r values between % of PD-1<sup>high</sup> based on each percentile and gene expression of exhaustion markers (CTLA-4, Tim-3 and Lag-3) in the patients' CD8<sup>+</sup> T cells are shown in the table. Since r values are highest in 97<sup>th</sup> percentile, the 97<sup>th</sup> percentile was used as cut-off in this study. **B)** Graph shows total PD-1 positive frequency among peripheral CD8<sup>+</sup> T cells in non-responders (NR) and responders (R) at the pre-treatment (1<sup>st</sup>) point.

# Supplementary Fig. S5

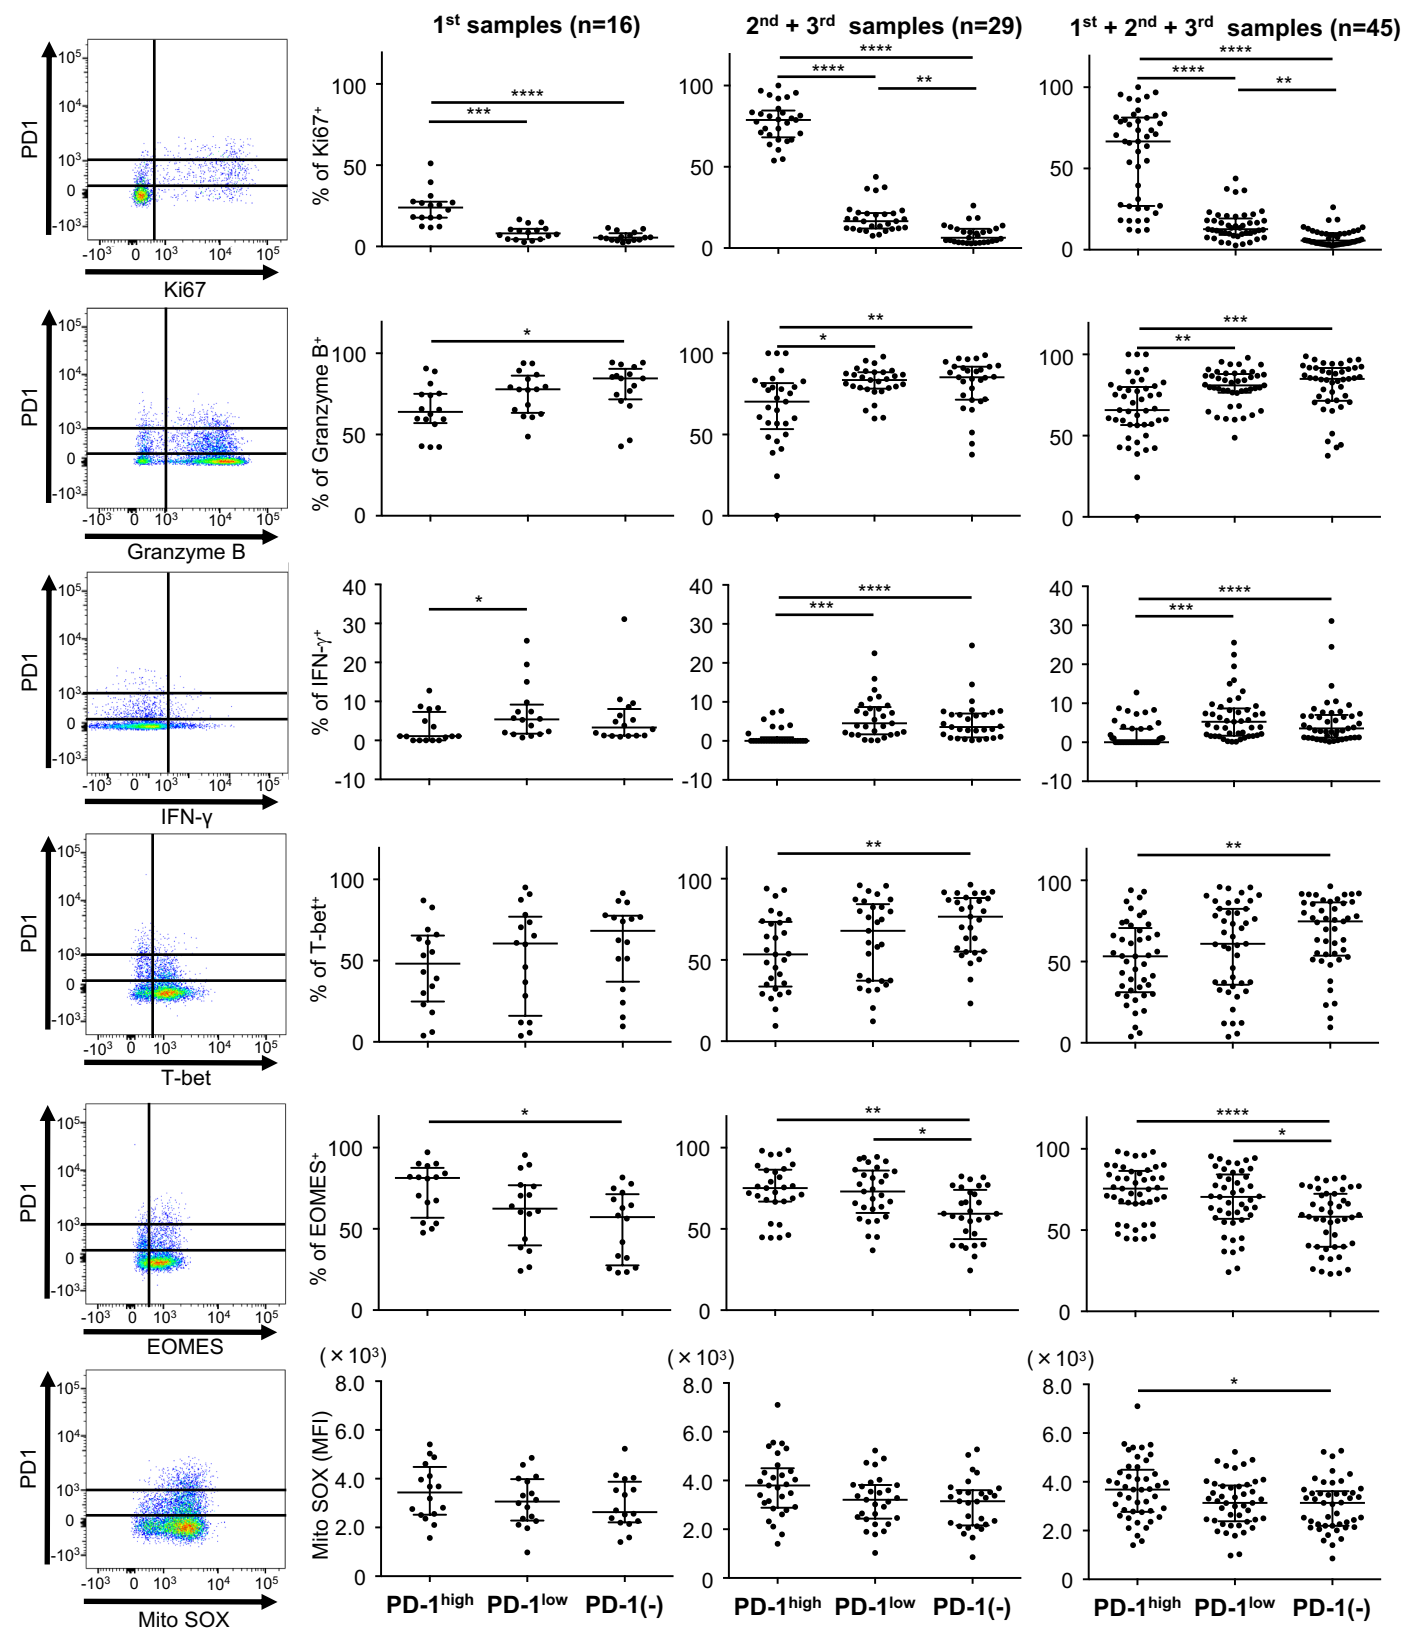

**Supplementary Fig. S5. Detailed phenotypes of PD-1 positive subsets in CD8<sup>+</sup> T cells.** FACS data show the expression levels of PD-1, Ki-67, Granzyme B, IFN- $\gamma$ , T-bet, EOMES, and Mito SOX among CD8<sup>+</sup> T cell in PBMC. Representative FACS plots of NSCLC samples are depicted (left panels). Indicated parameters between PD-1<sup>hi</sup>, PD-1<sup>low</sup>, and PD-1 negative CD8<sup>+</sup> T cells are shown. \* $p < 0.05$ , \*\* $p < 0.01$ , \*\*\* $p < 0.001$ , \*\*\*\* $p < 0.0001$  by Kruskal–Wallis test followed by Dunn’s multiple comparisons test.

# Supplementary Fig. S6

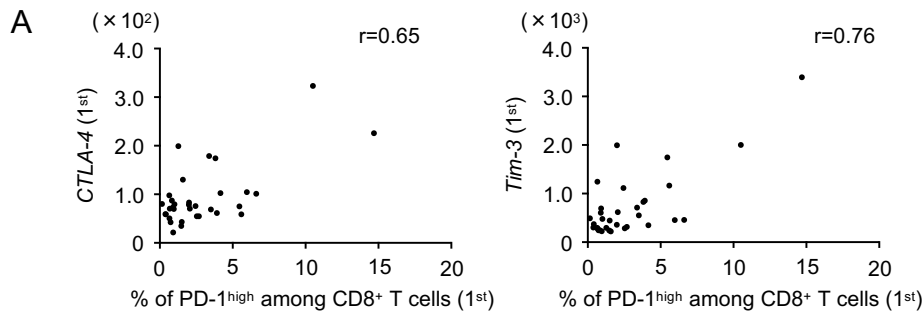

**B**

| Marker name among CD8 <sup>+</sup> PD-1 <sup>high</sup> | p-value * | Time point      | Number of patients analyzed |
|---------------------------------------------------------|-----------|-----------------|-----------------------------|
| Ki67 <sup>+</sup> (%)                                   | 0.31      | 1 <sup>st</sup> | 16                          |
| Ki67 <sup>+</sup> (%)                                   | 0.19      | 2 <sup>nd</sup> | 16                          |
| Ki67 <sup>+</sup> (%)                                   | 0.91      | 3 <sup>rd</sup> | 13                          |
| Granzyme B <sup>+</sup> (%)                             | 0.18      | 1 <sup>st</sup> | 16                          |
| Granzyme B <sup>+</sup> (%)                             | 0.85      | 2 <sup>nd</sup> | 16                          |
| Granzyme B <sup>+</sup> (%)                             | 0.25      | 3 <sup>rd</sup> | 13                          |
| IFN- $\gamma$ <sup>+</sup> (%)                          | 0.43      | 1 <sup>st</sup> | 16                          |
| IFN- $\gamma$ <sup>+</sup> (%)                          | 0.51      | 2 <sup>nd</sup> | 16                          |
| IFN- $\gamma$ <sup>+</sup> (%)                          | 0.65      | 3 <sup>rd</sup> | 13                          |
| T-bet <sup>+</sup> (%)                                  | 0.32      | 1 <sup>st</sup> | 16                          |
| T-bet <sup>+</sup> (%)                                  | 0.32      | 2 <sup>nd</sup> | 16                          |
| T-bet <sup>+</sup> (%)                                  | 0.71      | 3 <sup>rd</sup> | 13                          |
| EOMES <sup>+</sup> (%)                                  | 0.09      | 1 <sup>st</sup> | 16                          |
| EOMES <sup>+</sup> (%)                                  | 0.83      | 2 <sup>nd</sup> | 16                          |
| EOMES <sup>+</sup> (%)                                  | 0.15      | 3 <sup>rd</sup> | 13                          |

\*: p-value for distinction between R and NR (Wilcoxon rank sum test).

**Supplementary Fig. S6. Characteristics of PD-1<sup>high</sup> CD8<sup>+</sup> T cells.** **A)** Scatter plots between frequency of PD-1<sup>high</sup> (X-axis) and exhaustion marker gene expression in purified CD8<sup>+</sup> T cells from the same cohort (Y-axis).  $r$ : Pearson correlation coefficients. Generally,  $|r|$  of more than 0.6 in Pearson are considered to have strong correlation. **B)** p-values of each frequency among CD8<sup>+</sup> PD-1<sup>high</sup> T cells between non-responders and responders are listed in the table.

# Supplementary Fig. S7

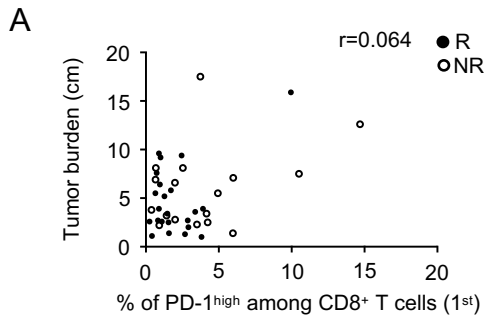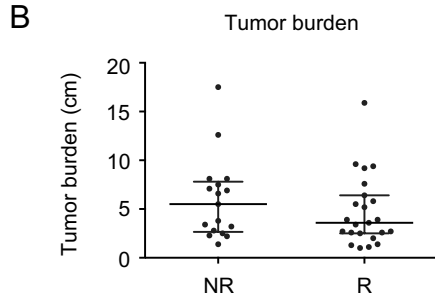

**Supplementary Fig. S7. Correlation analysis between PD-1<sup>high</sup> CD8<sup>+</sup> T cells and tumor burden. A)** Scatter plots between frequency of PD-1<sup>high</sup> (X-axis) and tumor burden (Y-axis). The dots and the circles represent the responders and the non-responders, respectively.  $r$ : Spearman correlation coefficients. **B)** Graphs show comparison of tumor burden between non-responders and responders. Each dot represents one patient. Error bars indicate the median and interquartile range.

# Supplementary Fig. S8

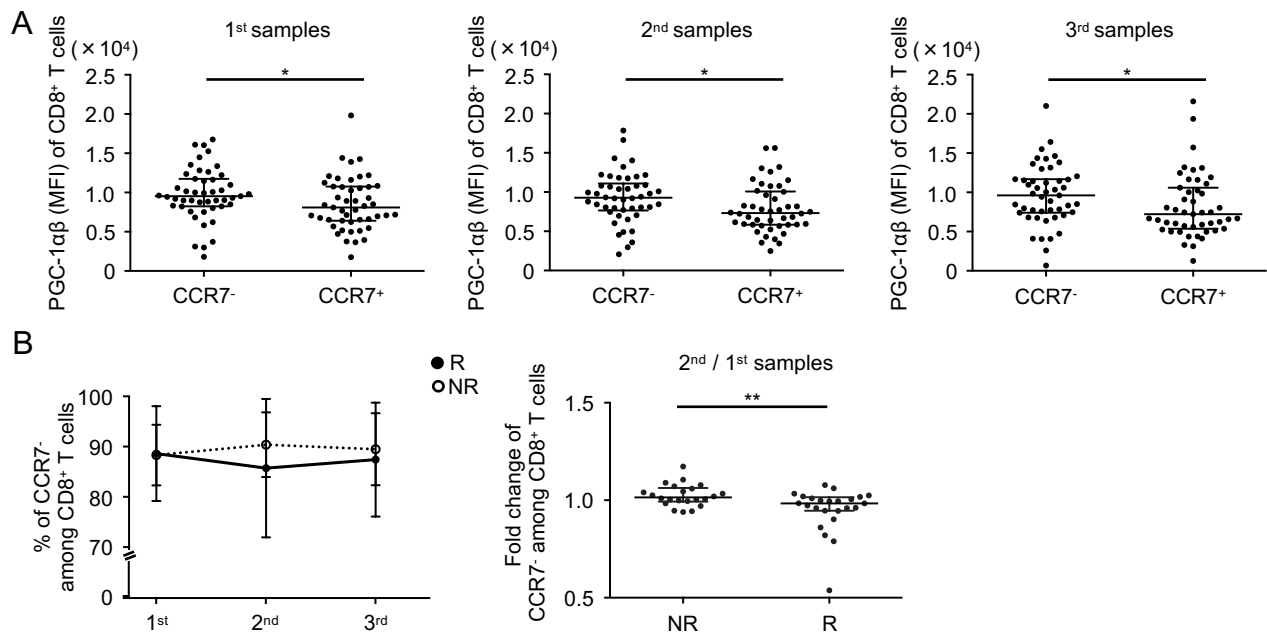

## Supplementary Fig. S8. CCR7<sup>-</sup> CD8<sup>+</sup> T cells with higher PGC-1 $\alpha\beta$ expression decreased by PD-1 blockade.

**A)** PGC-1 $\alpha\beta$  expression (MFI) between CCR7<sup>-</sup> and CCR7<sup>+</sup> T cells in the 1<sup>st</sup> (left), 2<sup>nd</sup> (middle), and 3<sup>rd</sup> samples (right) were shown. Each dot represents one patient. Error bars indicate the median and interquartile range. \* $p < 0.05$  by Wilcoxon rank sum test. **B)** Frequency of CCR7<sup>-</sup> among peripheral CD8<sup>+</sup> T cells in the 1<sup>st</sup>, 2<sup>nd</sup>, and 3<sup>rd</sup> samples (left). The solid line and dotted line represent responders and non-responders, respectively. Fold change (2<sup>nd</sup>/1<sup>st</sup>) of CCR7<sup>-</sup> frequency among CD8<sup>+</sup> T cells in non-responders and responders (right). \*\* $p < 0.01$  by Wilcoxon rank sum test.



# Supplementary Fig. S9

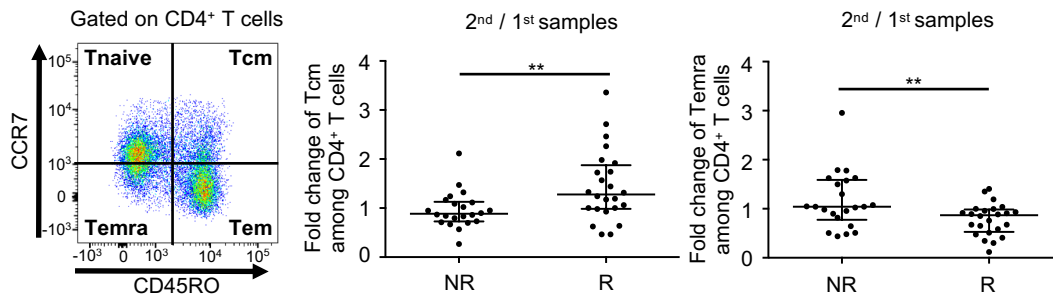

**Supplementary Fig. S9. Change of CD4<sup>+</sup> T cell subset ratios by PD-1 blockade.** CD4<sup>+</sup> T cells are divided into naïve, Tcm, Tem, and Temra subsets according to the expression of CD45RO and CCR7 (left panel). The frequency of CD4<sup>+</sup> Tcm and CD4<sup>+</sup> Temra in non-responders and responders is shown (middle and right panels). \*\* $p < 0.01$  by Wilcoxon rank sum test.

# Supplementary Fig. S10

Cellular marker combination II  
(NSCLC patients with EGFR mutation, error rate: 0%)

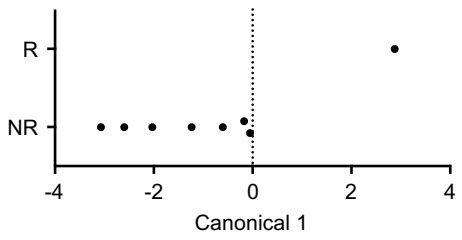

**Supplementary Fig. S10. Results of cellular marker combination II in patients with EGFR mutation.** Canonical plot for NSCLC patients with EGFR mutation based on cellular marker combination II.

## Supplementary Fig. S11

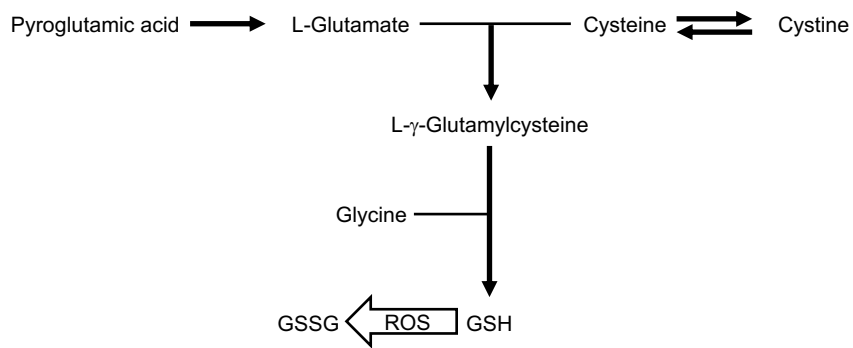

### Supplementary Fig. S11. Schema showing biosynthesis and metabolism of glutathione.

L-Glutamate and Cysteine are combined to form L-γ-Glutamylcysteine, which is then combined with glycine to yield GSH. GSH is oxidized into its oxidized form (GSSG) after reaction with reactive oxygen species (ROS).

## Supplementary Fig. S12

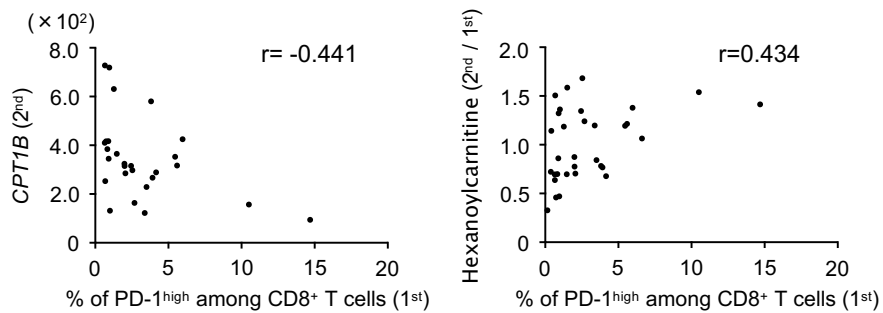

**Supplementary Fig. S12. Modest correlation between % of PD-1<sup>high</sup> among CD8<sup>+</sup> T cells and FAO-related factors.** Scatter plots between frequency of PD-1<sup>high</sup> (X-axis) and the FAO-related gene (left panel) or metabolite marker (right panel) (Y-axis).  $r$ : Spearman correlation coefficients.  $|r|$  of more than 0.4 in spearman are considered to have modest to strong correlation.

# Supplementary Table S1

Patient demographics (discovery cohort).

|                       | All patients | responders | non-responders | dropout   |
|-----------------------|--------------|------------|----------------|-----------|
| Number                | 55           | 25         | 22             | 8         |
| Age (range)           | 31-83        | 48-83      | 33-81          | 31-79     |
| Age (median)          | 68           | 70         | 64.5           | 70        |
| Male                  | 39 (70.9%)   | 19 (76.0%) | 15 (68.2%)     | 5 (62.5%) |
| Adenocarcinoma        | 43 (78.2%)   | 18 (72.0%) | 18 (81.8%)     | 7 (87.5%) |
| EGFR mutation         | 9 (17.3%)    | 1 (7.0%)   | 7 (35.0%)      | 1 (12.5%) |
| ALK translocation     | 3 (6.8%)     | 0 (0%)     | 2 (7.1%)       | 1 (14.3%) |
| Antibiotics treatment | 17 (30.9%)   | 6 (24.0%)  | 8 (36.4%)      | 3 (37.5%) |

# Supplementary Table S2

Metabolites measured by GC-MS.

| Name                                        | Kegg ID | HMDB ID      | Methyloxime/TMS derivative                       | m/z   | Retention time(min) | Name                  | Kegg ID | HMDB ID      | Methyloxime/TMS derivative      | m/z   | Retention time(min) |
|---------------------------------------------|---------|--------------|--------------------------------------------------|-------|---------------------|-----------------------|---------|--------------|---------------------------------|-------|---------------------|
| 1,5-Anhydro-D-sorbitol                      | C07326  | HMDB0002712  | 1,5-Anhydro-D-sorbitol-4TMS                      | 259.0 | 14.77               | Hypotaurine           | C00519  | HMDB0000965  | Hypotaurine-3TMS                | 188.1 | 12.92               |
| 1,6-Anhydroglucose                          | -       | HMDB0000640  | 1,6-Anhydro-beta-D-glucose-3TMS                  | 204.0 | 13.70               | Hypoxanthine          | C00262  | HMDB0000157  | Hypoxanthine-2TMS               | 265.0 | 14.50               |
| 1-Hexadecanol                               | C00823  | HMDB0003424  | 1-Hexadecanol-TMS                                | 299.0 | 15.37               | Indoleacetic acid     | C00954  | HMDB0000197  | Indol-3-acetic acid-2TMS        | 202.0 | 15.68               |
| 2-Amino adipic acid                         | C00956  | HMDB00000510 | 2-Amino adipic acid-3TMS                         | 260.0 | 13.62               | Indolelactic acid     | C02043  | HMDB0000671  | Indolelactic acid-3TMS          | 202.0 | 17.08               |
| 2-Aminobutyric acid                         | C02356  | HMDB0000452  | 2-Aminobutyric acid-2TMS                         | 130.0 | 8.69                | Indoxyl sulfate       | -       | HMDB0000682  | Indoxyl sulfate-2TMS            | 277.0 | 13.84               |
| 2-Aminoethanol                              | C00189  | HMDB0000149  | 2-Aminoethanol-3TMS                              | 174.0 | 9.77                | Isocitric acid        | C00311  | HMDB0000193  | Isocitric acid-4TMS             | 245.0 | 14.41               |
| 2-Deoxytetronic acid                        | -       | HMDB0000337  | 2-Deoxytetronic acid-3TMS                        | 321.0 | 11.20               | Isoleucine            | C16434  | HMDB0000172  | Isoleucine-2TMS                 | 232.0 | 9.99                |
| 2-Hydroxybutyric acid                       | C05984  | HMDB0000008  | 2-Hydroxybutyric acid-2TMS                       | 131.0 | 8.17                | Kynurenine            | C00328  | HMDB0000684  | Kynurenine-3TMS                 | 307.0 | 17.07               |
| 2-Hydroxyisobutyric acid                    | -       | HMDB0000729  | 2-Hydroxyisobutyric acid-2TMS                    | 131.0 | 7.46                | Lactic acid           | C00186  | HMDB0000190  | Lactic acid-2TMS                | 219.0 | 7.39                |
| 2-Hydroxyisovaleric acid                    | -       | HMDB0000407  | 2-Hydroxyisovaleric acid-2TMS                    | 145.0 | 8.61                | Lauric acid           | C02679  | HMDB0000638  | Lauric acid-TMS                 | 257.0 | 13.11               |
| 2-Hydroxypyridine                           | C02502  | HMDB0013751  | 2-Hydroxypyridine-TMS                            | 152.0 | 7.22                | Leucine               | C00123  | HMDB0000687  | Leucine-2TMS                    | 232.0 | 9.74                |
| 2-Oxobutyric acid                           | C00109  | HMDB0000005  | 2-Oxobutyric acid-methyloxime-TMS                | 188.0 | 7.86                | Linoleic acid         | C01595  | HMDB0000673  | Linoleic acid-TMS               | 337.0 | 17.06               |
| 2-Oxoglutaric acid (α-Ketoglutaric acid)    | C00026  | HMDB0000208  | 2-Oxoglutaric acid-methyloxime-2TMS              | 198.0 | 12.47               | Lysine                | C00047  | HMDB0000182  | Lysine-4TMS                     | 174.0 | 15.23               |
| 2-Oxoisocaproic acid                        | C00233  | HMDB0000695  | 2-Oxoisocaproic acid-methyloxime-TMS             | 200.0 | 9.10                | Malic acid            | C00711  | HMDB0000156  | Malic acid-3TMS                 | 233.0 | 11.73               |
| 3-(3-Hydroxyphenyl)-3-hydroxypropionic acid | -       | HMDB0002643  | 3-(3-Hydroxyphenyl)-3-hydroxypropionic acid-3TMS | 267.0 | 14.68               | Maltose               | C00208  | HMDB0000163  | Maltose-methyloxime-8TMS        | 204.0 | 20.64               |
| 3-Aminoisobutyric acid                      | C05145  | HMDB00003911 | 3-Aminoisobutyric acid-3TMS                      | 304.0 | 11.67               | Mannose               | C00159  | HMDB0000169  | Mannose-methyloxime-5TMS        | 319.0 | 15.05               |
| 3-Hydroxybutyric acid                       | C01089  | HMDB0000357  | 3-Hydroxybutyric acid-2TMS                       | 191.0 | 8.51                | Margaric acid         | -       | HMDB0002259  | Margaric acid-TMS               | 117.0 | 16.58               |
| 3-Hydroxyisobutyric acid                    | C06001  | HMDB0000023  | 3-Hydroxyisobutyric acid-2TMS                    | 177.0 | 8.51                | Methionine            | C00073  | HMDB0000696  | Methionine-2TMS                 | 250.0 | 12.14               |
| 3-Hydroxyisovaleric acid                    | -       | HMDB0000754  | 3-Hydroxyisovaleric acid-2TMS                    | 131.0 | 9.09                | myo-Inositol          | C00137  | HMDB0000211  | myo-Inositol-6TMS               | 432.0 | 16.54               |
| 3-Indolepropionic acid                      | -       | HMDB0002302  | 3-Indolepropionic acid-2TMS                      | 202.0 | 16.50               | Myristic acid         | C06424  | HMDB0000806  | Myristic acid-TMS               | 285.0 | 14.60               |
| 3-Methyl-2-oxobutyric acid                  | C00141  | HMDB0000019  | 3-Methyl-2-oxobutyric acid-methyloxime-TMS       | 89.0  | 7.96                | Octanoic acid         | C06423  | HMDB0000482  | Octanoic acid-TMS               | 201.0 | 9.62                |
| 3-Methyl-2-oxovaleric acid                  | C00671  | HMDB0000491  | 3-Methyl-2-oxovaleric acid-methyloxime-TMS       | 200.0 | 8.97                | Oleic acid            | C00712  | HMDB0000207  | Oleic acid-TMS                  | 339.0 | 17.08               |
| 3-Methylhistidine                           | C01152  | HMDB0000479  | 3-Methylhistidine-2TMS                           | 168.0 | 15.01               | O-Phosphoethanolamine | C00346  | HMDB0000224  | O-Phosphoethanolamine-4TMS      | 299.0 | 14.29               |
| 4-Cresol                                    | C01468  | HMDB0001858  | 4-Cresol-TMS                                     | 180.0 | 8.56                | Ornithine             | C00077  | HMDB0000214  | Ornithine-4TMS                  | 420.0 | 14.52               |
| 4-Hydroxyproline                            | C01157  | HMDB0000725  | 4-Hydroxyproline-3TMS                            | 140.0 | 12.15               | Oxalic acid           | C00209  | HMDB0002329  | Oxalic acid-2TMS                | 219.0 | 8.13                |
| Acetoacetic acid                            | C00164  | HMDB0000060  | Acetoacetic acid-methyloxime-TMS                 | 203.0 | 8.01                | Palmitic acid         | C00249  | HMDB0000220  | Palmitic acid TMS               | 313.0 | 15.95               |
| Aconitic acid                               | C02341  | HMDB0000958  | Aconitic acid-3TMS                               | 375.0 | 13.81               | Palmitoleic acid      | C08362  | HMDB0003229  | Palmitoleic acid-TMS            | 311.0 | 15.85               |
| Alanine                                     | C00041  | HMDB0000161  | Alanine-2TMS                                     | 218.0 | 7.91                | Paraxanthine          | C13747  | HMDB0001860  | Paraxanthine-TMS                | 237.0 | 15.77               |
| Alanine                                     | C00041  | HMDB0000161  | Alanine-3TMS                                     | 188.0 | 10.77               | Phenol                | C00146  | HMDB0000228  | Phenol-TMS                      | 166.0 | 7.45                |
| Allose                                      | C01487  | HMDB0001151  | Allose-methyloxime-5TMS                          | 205.0 | 15.00               | Phenylalanine         | C00079  | HMDB0000159  | Phenylalanine-2TMS              | 192.0 | 13.12               |
| Arabinonic acid                             | -       | HMDB0000539  | Arabinonic acid-5TMS                             | 292.0 | 14.23               | Phosphoglycerol       | C03189  | HMDB0000126  | Phosphoglycerol-4TMS            | 445.0 | 14.00               |
| Arabinose                                   | C00259  | HMDB0000646  | Arabinose-methyloxime-4TMS                       | 307.0 | 13.26               | Phosphoric acid       | C00009  | HMDB0002142  | Phosphoric acid-3TMS            | 225.0 | 9.76                |
| Arabitol                                    | C01904  | HMDB0000568  | Arabitol-5TMS                                    | 217.0 | 13.75               | Pipecolic acid        | C00408  | HMDB0000070  | Pipecolic acid-TMS              | 156.0 | 10.44               |
| Asparagine                                  | C00152  | HMDB0000168  | Asparagine-3TMS                                  | 231.0 | 13.32               | Proline               | C00148  | HMDB0000162  | Proline-2TMS                    | 216.0 | 10.12               |
| Aspartic acid                               | C00049  | HMDB0000191  | Aspartic acid-3TMS                               | 232.0 | 12.03               | Pyroglutamic acid     | C01879  | HMDB0000267  | 5-Oxoproline-2TMS               | 258.0 | 12.21               |
| Benzoic acid                                | C00180  | HMDB0001870  | Benzoic acid-TMS                                 | 179.0 | 9.60                | Pyrophosphate         | -       | HMDB0000250  | Pyrophosphate-4TMS              | 451.0 | 13.32               |
| beta-Alanine                                | C00099  | HMDB0000056  | beta-Alanine-3TMS                                | 290.0 | 11.31               | Pyruvic acid          | C00022  | HMDB0000243  | Pyruvic acid-methyloxime-TMS    | 174.0 | 7.23                |
| Boric acid                                  | C12486  | HMDB0035731  | Boric acid-3TMS                                  | 263.0 | 6.49                | Ribitol               | C00474  | HMDB0000508  | Ribitol-5TMS                    | 319.0 | 13.81               |
| Caffeine                                    | C07481  | HMDB0001847  | Caffeine                                         | 194.0 | 15.05               | Ribose                | C00121  | HMDB0000283  | Ribose-methyloxime-4TMS         | 307.0 | 13.38               |
| Caproic acid                                | C01585  | HMDB0000535  | Caproic acid-TMS                                 | 173.0 | 7.52                | Ribulose              | C00309  | HMDB0000621  | Ribulose-methyloxime-4TMS       | 263.0 | 13.38               |
| Citric acid                                 | C00158  | HMDB0000094  | Citric acid-4TMS                                 | 363.0 | 14.45               | scyllo-Inositol       | C06153  | HMDB0000608  | scyllo-Inositol-6TMS            | 318.0 | 16.11               |
| Citrulline                                  | C00327  | HMDB0000904  | Citrulline-4TMS                                  | 256.0 | 14.48               | Serine                | C00065  | HMDB0000187  | Serine-3TMS                     | 306.0 | 10.58               |
| Creatinine                                  | C00791  | HMDB0000562  | Creatinine-3TMS                                  | 115.0 | 12.58               | Stearic acid          | C01530  | HMDB0000827  | Stearic acid-TMS                | 341.0 | 17.18               |
| Cysteine                                    | C00097  | HMDB0000574  | Cysteine-3TMS                                    | 218.0 | 12.44               | Succinic acid         | C00042  | HMDB0000254  | Succinic acid-2TMS              | 247.0 | 10.10               |
| Cysteinylglycine                            | C01419  | HMDB0000078  | Cysteinylglycine-3TMS                            | 220.0 | 16.14               | Sucrose               | C00089  | HMDB0000258  | Sucrose-8TMS                    | 361.0 | 19.79               |
| Cystine                                     | C00491  | HMDB0000192  | Cystine-4TMS                                     | 411.0 | 17.67               | Taurine               | C00245  | HMDB0000251  | 2-Aminoethanesulfonic acid-3TMS | 326.0 | 13.50               |
| Decanoic acid                               | C01571  | HMDB0000511  | Decanoic acid-TMS                                | 229.0 | 11.47               | Threitol              | C16884  | HMDB0004136  | Thereitol-4TMS                  | 217.0 | 11.84               |
| Elaidic acid                                | C01712  | HMDB0000573  | Elaidic acid-TMS                                 | 93.0  | 17.11               | Threonic acid         | C01620  | HMDB0000943  | Threonic acid-4TMS              | 292.0 | 12.38               |
| Erythritol                                  | C00503  | HMDB0002994  | Erythritol-4TMS                                  | 217.0 | 11.92               | Threonine             | C00188  | HMDB0000167  | Threonine-3TMS                  | 291.0 | 10.86               |
| Fructose                                    | C00095  | HMDB0000660  | Fructose-methyloxime-5TMS                        | 307.0 | 14.92               | Tryptophan            | C00078  | HMDB0000929  | Tryptophan-3TMS                 | 291.0 | 17.34               |
| Fucose                                      | C01019  | HMDB0000174  | Fucose-methyloxime-5TMS                          | 117.0 | 13.89               | Tyrosine              | C00082  | HMDB0000158  | Tyrosine-3TMS                   | 382.0 | 15.39               |
| Fumaric acid                                | C00122  | HMDB0000134  | Fumaric acid-2TMS                                | 245.0 | 10.37               | Unk12*                | -       | -            | -                               | 196.0 | 14.50               |
| Gluconic acid                               | C00257  | HMDB0000625  | Gluconic acid-methyloxime-5TMS                   | 292.0 | 15.94               | Unk3*                 | -       | -            | -                               | 170.0 | 8.98                |
| Glucose                                     | C00031  | HMDB0000122  | Glucose-methyloxime-5TMS                         | 229.0 | 15.32               | Unk4*                 | -       | -            | -                               | 319.0 | 9.56                |
| Glucuronic acid                             | C00191  | HMDB0000127  | Glucuronic acid-methyloxime-5TMS                 | 423.0 | 15.47               | Unk6*                 | -       | -            | -                               | 320.0 | 11.66               |
| Glutamic acid                               | C00025  | HMDB0000148  | Glutamic acid-3TMS                               | 246.0 | 12.85               | Unk8*                 | -       | -            | -                               | 116.0 | 13.96               |
| Glutamine                                   | C00064  | HMDB0000641  | Glutamine-3TMS                                   | 362.0 | 14.11               | Unk9*                 | -       | -            | -                               | 217.0 | 14.04               |
| Glutaric acid                               | C00489  | HMDB0000661  | Glutaric acid-2TMS                               | 261.0 | 10.94               | Urea                  | C00086  | HMDB0000294  | Urea-2TMS                       | 204.0 | 9.29                |
| Glyceric acid                               | C00258  | HMDB0000139  | Glyceric acid-3TMS                               | 292.0 | 10.28               | Uric acid             | C00366  | HMDB0000289  | Uric acid-4TMS                  | 367.0 | 16.40               |
| Glycerol                                    | C00116  | HMDB0000131  | Glycerol-3TMS                                    | 218.0 | 9.69                | Uridine               | C00299  | HMDB0000296  | Uridine-4TMS                    | 245.0 | 18.54               |
| Glycine                                     | C00037  | HMDB0000123  | Glycine-3TMS                                     | 174.0 | 10.20               | Valine                | C00183  | HMDB0000883  | Valine-2TMS                     | 218.0 | 9.19                |
| Glycolic acid                               | C00160  | HMDB0000115  | Glycolic acid-2TMS                               | 205.0 | 7.53                | Xanthine              | C00385  | HMDB0000216  | Xanthine-3TMS                   | 353.0 | 15.92               |
| Hippuric acid                               | C01586  | HMDB0000714  | Hippuric acid-TMS                                | 236.0 | 14.75               | Xylitol               | C00379  | HMDB00002917 | Xylitol-5TMS                    | 217.0 | 13.66               |
| Histidine                                   | C00135  | HMDB0000177  | Histidine-3TMS                                   | 371.0 | 15.28               | Xylose                | C00181  | HMDB0000098  | Xylose-methyloxime-4TMS         | 307.0 | 13.21               |
| Homocysteine                                | C00155  | HMDB0000742  | Homocysteine-3TMS                                | 234.0 | 13.33               |                       |         |              |                                 |       |                     |

\* 'Unk' means that these metabolites were not yet identified at the time of analysis.

# Supplementary Table S3

Metabolites measured by LC-MS.

| Name                             | Kegg ID | HMDB ID     | Ion transition | Retention time(min) | Name                                     | Kegg ID | HMDB ID     | Ion transition | Retention time(min) |
|----------------------------------|---------|-------------|----------------|---------------------|------------------------------------------|---------|-------------|----------------|---------------------|
| 4-Hydroxyproline                 | C01157  | HMDB0000725 | 132.10>68.05   | 1.89                | Valine                                   | C00183  | HMDB0000883 | 118.10>55.10   | 3.15                |
| Acetylalanine                    | -       | HMDB0000766 | 132.10>90.10   | 4.00                | Xanthosine                               | C01762  | HMDB0000299 | 285.10>153.20  | 8.61                |
| Acetylglycine                    | -       | HMDB0000532 | 118.00>76.10   | 3.53                | Xanthurenic acid                         | C02470  | HMDB0000881 | 206.00>160.00  | 9.75                |
| Adenosine                        | C00212  | HMDB0000050 | 268.10>136.10  | 8.35                | as-Dimethylarginine                      | C03626  | HMDB0001539 | 203.10>46.10   | 2.47                |
| Adenosylhomocysteine             | C00021  | HMDB0000939 | 385.10>136.10  | 8.23                | sym-Dimethylarginine                     | -       | HMDB0003334 | 203.10>172.20  | 2.57                |
| Adenosylmethionine               | C00019  | HMDB0001185 | 399.10>250.10  | 2.18                | trans-urocanic acid                      | C00785  | HMDB0000301 | 139.10>93.10   | 4.70                |
| 2-Amino adipic acid              | C00956  | HMDB0000510 | 162.10>98.20   | 2.35                | 2-Hydroxy-3-methylvaleric acid           | -       | HMDB0000317 | 131.10>85.15   | 11.52               |
| Argininosuccinic acid            | C03406  | HMDB0000052 | 291.10>70.10   | 2.08                | 2-Hydroxybutyric acid                    | C05984  | HMDB0000008 | 103.00>57.20   | 7.95                |
| Asparagine                       | C00152  | HMDB0000168 | 133.10>74.05   | 1.85                | 2-Hydroxyglutaric acid                   | C01087  | HMDB0000606 | 147.00>129.05  | 4.27                |
| Aspartic acid                    | C00049  | HMDB0000191 | 134.10>88.00   | 1.85                | 2-Hydroxyisovaleric acid                 | -       | HMDB0000407 | 117.10>71.10   | 9.89                |
| Betaine                          | C00719  | HMDB0000043 | 118.10>42.05   | 2.07                | 2-Oxoglutaric acid (α-Ketoglutaric acid) | C00026  | HMDB0000208 | 145.10>57.10   | 3.24                |
| Creatine                         | C00300  | HMDB0000064 | 132.10>44.05   | 2.30                | 3-Hydroxybutyric acid                    | C01089  | HMDB0000357 | 103.00>59.10   | 6.64                |
| Creatinine                       | C00791  | HMDB0000562 | 114.10>86.10   | 2.18                | 3-Hydroxyisovaleric acid                 | -       | HMDB0000754 | 117.10>59.10   | 8.89                |
| Cystathionine                    | C00542  | HMDB0000099 | 223.10>88.00   | 1.84                | 3-Methylglutaconic acid                  | -       | HMDB0000522 | 143.00>99.05   | 10.07               |
| Cysteine                         | C00097  | HMDB0000574 | 122.00>59.00   | 2.04                | 4-Hydroxybenzoic acid                    | C00156  | HMDB0000500 | 137.00>93.00   | 10.98               |
| Cystine                          | C00491  | HMDB0000192 | 241.00>74.10   | 1.83                | AMP                                      | -       | HMDB0000045 | 346.10>79.05   | 4.14                |
| GSH                              | C00051  | HMDB0000125 | 308.10>179.20  | 4.32                | Aconitic acid                            | C02341  | HMDB0000958 | 173.00>85.15   | 8.17                |
| GSSG                             | C00127  | HMDB0003337 | 613.20>231.00  | 8.17                | Arabinonic acid                          | -       | HMDB0000539 | 165.00>75.05   | 2.01                |
| Glutamic acid                    | C00025  | HMDB0000148 | 148.10>102.05  | 1.98                | Citric acid                              | C00158  | HMDB0000094 | 191.00>87.10   | 4.59                |
| Glutamine                        | C00064  | HMDB0000641 | 147.10>130.05  | 1.92                | Fumaric acid                             | C00122  | HMDB0000134 | 115.00>71.10   | 5.93                |
| Glycine                          | C00037  | HMDB0000123 | 76.00>30.10    | 1.84                | Glutaric acid                            | C00489  | HMDB0000661 | 131.00>87.15   | 8.71                |
| Guanosine                        | C00387  | HMDB0000133 | 284.10>152.10  | 8.39                | Hippuric acid                            | C01586  | HMDB0000714 | 178.10>134.05  | 11.14               |
| Histidine                        | C00135  | HMDB0000177 | 156.10>83.20   | 1.84                | Indoxyl sulfate                          | -       | HMDB0000682 | 212.00>132.20  | 10.58               |
| Indoleacetic acid                | C00954  | HMDB0000197 | 176.10>130.10  | 13.67               | Isochiric acid                           | C00311  | HMDB0000193 | 191.00>73.10   | 2.96                |
| Indolelactic acid                | C02043  | HMDB0000671 | 206.10>118.10  | 12.62               | Lactic acid                              | C00186  | HMDB0000190 | 89.00>43.10    | 3.67                |
| Indolepyruvic acid               | C00331  | HMDB0060484 | 204.10>130.10  | 12.41               | Malic acid                               | C00711  | HMDB0000156 | 133.00>115.00  | 2.89                |
| Inosine                          | C00294  | HMDB0000195 | 269.10>110.10  | 8.40                | Phenyllactic acid                        | C05607  | HMDB0000748 | 165.10>147.05  | 12.32               |
| Kynurenic acid                   | C01717  | HMDB0000715 | 190.10>144.00  | 10.13               | Pyridoxic acid                           | C00847  | HMDB0000017 | 182.00>108.05  | 8.56                |
| Kynurenine                       | C00328  | HMDB0000684 | 209.10>192.05  | 9.00                | Succinic acid                            | C00042  | HMDB0000254 | 117.00>73.05   | 5.90                |
| 3-Hydroxykynurenine              | C02794  | HMDB0000732 | 225.10>110.15  | 7.49                | cAMP                                     | C00575  | HMDB0000058 | 328.00>134.20  | 8.36                |
| N <sup>6</sup> -Formylkynurenine | C02700  | HMDB0001200 | 237.20>146.05  | 9.02                | Thyroxine                                | C01829  | HMDB0000248 | 777.70>731.50  | 15.07               |
| Leucine                          | C00123  | HMDB0000687 | 132.10>43.10   | 7.06                | Pipecolic acid                           | C00408  | HMDB0000070 | 130.10>84.30   | 3.41                |
| Isoleucine                       | C16434  | HMDB0000172 | 132.10>69.10   | 6.50                | 3-Indolepropionic acid                   | -       | HMDB0002302 | 190.10>130.10  | 14.73               |
| Lysine                           | C00047  | HMDB0000182 | 147.10>84.10   | 1.64                | Quinolinic acid                          | C03722  | HMDB0000232 | 168.10>78.05   | 4.40                |
| Methionine                       | C00073  | HMDB0000696 | 150.10>104.00  | 3.93                | 3-Methylhistidine                        | C01152  | HMDB0000479 | 170.10>81.10   | 1.85                |
| S-Methylmethionine               | C05319  | HMDB0038670 | 165.10>59.20   | 9.54                | Carnitine                                | C00318  | HMDB0000062 | 162.10>85.10   | 2.13                |
| N-Acetyl-Asp-Glu                 | C12270  | HMDB0001067 | 305.10>148.00  | 8.17                | Acetylcarnitine                          | C02571  | HMDB0000201 | 204.10>85.10   | 4.16                |
| N-Acetylaspartic acid            | C01042  | HMDB0000812 | 176.10>134.00  | 4.08                | Propionylcarnitine                       | C03017  | HMDB0000824 | 218.10>85.10   | 8.49                |
| N-Acetylhistidine                | C02997  | HMDB0032055 | 198.10>110.10  | 2.81                | Isobutyrylcarnitine                      | -       | HMDB0000736 | 232.20>85.15   | 9.38                |
| Nicotinamide                     | C00153  | HMDB0001406 | 123.10>80.05   | 5.13                | Butyrylcarnitine                         | C02862  | HMDB0002013 | 232.20>85.05   | 9.51                |
| Phenylalanine                    | C00079  | HMDB0000159 | 166.10>103.10  | 8.94                | 2-Methylbutyrylcarnitine                 | -       | HMDB0000378 | 246.20>85.10   | 10.44               |
| Phosphocholine                   | C00588  | HMDB0001565 | 184.10>125.00  | 1.85                | Isovalerylcarnitine                      | C20826  | HMDB0000688 | 246.20>85.15   | 10.58               |
| Proline                          | C00148  | HMDB0000162 | 116.10>70.10   | 2.28                | Hexanoylcarnitine                        | -       | HMDB0000705 | 260.20>85.15   | 11.88               |
| Pyroglutamic acid                | C01879  | HMDB0000267 | 130.00>56.10   | 5.16                | Glutaryl carnitine                       | -       | HMDB0013130 | 276.10>85.05   | 8.48                |
| Riboflavin                       | C00255  | HMDB0000244 | 377.10>243.20  | 10.59               | Adipoylcarnitine                         | -       | HMDB0061677 | 290.20>85.00   | 8.96                |
| Serine                           | C00065  | HMDB0000187 | 106.10>60.00   | 1.85                | 2-Aminobutyric acid                      | C02356  | HMDB0000452 | 104.10>41.05   | 2.19                |
| Serotonin                        | C00780  | HMDB0000259 | 177.10>160.20  | 8.73                | Choline                                  | C00114  | HMDB0000097 | 104.10>60.00   | 1.99                |
| Putrescine                       | C00134  | HMDB0001414 | 89.10>72.10    | 1.60                | 3-Aminoisobutyric acid                   | C05145  | HMDB0003911 | 104.10>86.10   | 2.31                |
| Spermidine                       | C00315  | HMDB0001257 | 146.20>129.20  | 1.39                | Acetylcarnosine                          | -       | HMDB0012881 | 269.10>110.10  | 4.25                |
| Spermine                         | C00750  | HMDB0001256 | 203.20>112.20  | 1.33                | Alanine                                  | C00041  | HMDB0000161 | 90.00>44.10    | 1.91                |
| Taurine                          | C00245  | HMDB0000251 | 126.00>44.05   | 1.87                | Ornithine                                | C00077  | HMDB0000214 | 133.10>116.05  | 1.65                |
| Threonine                        | C00188  | HMDB0000167 | 120.10>84.10   | 1.94                | Arginine                                 | C00062  | HMDB0000517 | 175.10>70.10   | 1.83                |
| Trigonelline                     | C01004  | HMDB0000875 | 138.00>94.10   | 2.39                | Citrulline                               | C00327  | HMDB0000904 | 176.10>159.05  | 2.05                |
| Trimethyllysine                  | C03793  | HMDB0001325 | 189.20>60.25   | 1.82                | Glucuronic acid                          | C00191  | HMDB0000127 | 193.00>103.00  | 1.95                |
| Tryptophan                       | C00078  | HMDB0000929 | 205.10>115.20  | 9.84                | Gluconic acid                            | C00257  | HMDB0000625 | 195.10>129.00  | 1.96                |
| Tyrosine                         | C00082  | HMDB0000158 | 182.10>136.20  | 7.30                | N-Acetylglucosamine                      | C00140  | HMDB0000215 | 222.10>138.00  | 2.33                |
| Urea                             | C00086  | HMDB0000294 | 61.00>44.05    | 2.05                | N-Acetylneuraminic acid                  | C00270  | HMDB0000230 | 310.10>274.10  | 2.17                |
| Uric acid                        | C00366  | HMDB0000289 | 169.00>126.05  | 5.26                | 4-Guanidinobutanoic acid                 | C01035  | HMDB0003464 | 146.10>86.15   | 3.82                |
| Uridine                          | C00299  | HMDB0000296 | 245.10>113.10  | 7.51                | N-Acetylmethionine                       | C00437  | HMDB0003357 | 175.10>70.05   | 2.67                |

# Supplementary Table S4

Cellular markers measured by flow cytometry.

---

| Cellular markers                                                                   |
|------------------------------------------------------------------------------------|
| % of CCR6 <sup>+</sup> cells among CD4 <sup>+</sup> T cells                        |
| % of CD25 <sup>+</sup> cells among CD4 <sup>+</sup> T cells                        |
| % of CD4 <sup>+</sup> T cells among PBMC                                           |
| % of CD8 <sup>+</sup> T cells among PBMC                                           |
| % of CTLA4 <sup>+</sup> cells among CD4 <sup>+</sup> T cells                       |
| % of CXCR3 <sup>+</sup> cells among CD4 <sup>+</sup> T cells                       |
| % of FoxP3 <sup>+</sup> cells among CD4 <sup>+</sup> T cells                       |
| % of FoxP3 <sup>high</sup> cells among CD4 <sup>+</sup> T cells                    |
| % of FoxP3 <sup>low</sup> cells among CD4 <sup>+</sup> T cells                     |
| % of FoxP3 <sup>+</sup> CD25 <sup>+</sup> cells among CD4 <sup>+</sup> T cells     |
| % of FoxP3 <sup>low</sup> CD45RA <sup>+</sup> cells among CD4 <sup>+</sup> T cells |
| % of FoxP3 <sup>+</sup> CTLA4 <sup>+</sup> cells among CD4 <sup>+</sup> T cells    |
| % of IFN $\gamma$ <sup>+</sup> cells among CD4 <sup>+</sup> T cells                |
| % of IFN $\gamma$ <sup>+</sup> cells among CD8 <sup>+</sup> T cells                |
| % of KLRG1 <sup>+</sup> cells among CD4 <sup>+</sup> T cells                       |
| % of KLRG1 <sup>+</sup> CCR6 <sup>+</sup> cells among CD4 <sup>+</sup> T cells     |
| % of KLRG1 <sup>+</sup> cells among CD8 <sup>+</sup> T cells                       |
| % of PD-1 <sup>+</sup> cells among CD4 <sup>+</sup> T cells                        |
| % of PD-1 <sup>+</sup> CD45 <sup>+</sup> cells among CD4 <sup>+</sup> T cells      |
| % of PD-1 <sup>+</sup> FoxP3 <sup>+</sup> cells among CD4 <sup>+</sup> T cells     |
| % of PD-1 <sup>+</sup> cells among CD8 <sup>+</sup> T cells                        |
| % of PD-1 <sup>high</sup> cells among CD8 <sup>+</sup> T cells                     |
| % of T-bet <sup>+</sup> cells among CD4 <sup>+</sup> T cells                       |
| % of T-bet <sup>high</sup> cells among CD4 <sup>+</sup> T cells                    |
| % of T-bet <sup>+</sup> KLRG1 <sup>+</sup> cells among CD4 <sup>+</sup> T cells    |
| % of T-bet <sup>+</sup> cells among CD8 <sup>+</sup> T cells                       |
| % of T-bet <sup>high</sup> cells among CD8 <sup>+</sup> T cells                    |
| % of EOMES <sup>+</sup> cells among CD8 <sup>+</sup> T cells                       |
| % of T-bet <sup>+</sup> EOMES <sup>-</sup> cells among CD8 <sup>+</sup> T cells    |
| % of T-bet <sup>+</sup> EOMES <sup>+</sup> cells among CD8 <sup>+</sup> T cells    |
| % of T-bet <sup>-</sup> EOMES <sup>+</sup> cells among CD8 <sup>+</sup> T cells    |
| % of Tnaive among CD4 <sup>+</sup> T cells                                         |
| % of Tcm among CD4 <sup>+</sup> T cells                                            |
| % of Tem among CD4 <sup>+</sup> T cells                                            |
| % of Temra among CD4 <sup>+</sup> T cells                                          |
| % of Tnaive among CD8 <sup>+</sup> T cells                                         |
| % of Tcm among CD8 <sup>+</sup> T cells                                            |
| % of Tem among CD8 <sup>+</sup> T cells                                            |
| % of Temra among CD8 <sup>+</sup> T cells                                          |
| % of Tim3 <sup>+</sup> cells among CD4 <sup>+</sup> T cells                        |
| % of Tim3 <sup>+</sup> cells among CD8 <sup>+</sup> T cells                        |
| Cell ROX Green (MFI) of CD4 <sup>+</sup> T cells                                   |
| Cell ROX Green (MFI) of CD8 <sup>+</sup> T cells                                   |
| Mito SOX Red (MFI) of CD4 <sup>+</sup> T cells                                     |
| Mito SOX Red (MFI) of CD8 <sup>+</sup> T cells                                     |
| Mito Tracker Deep Red (MFI) of CD4 <sup>+</sup> T cells                            |
| Mito Tracker Deep Red (MFI) of CD8 <sup>+</sup> T cells                            |
| Mito Tracker Green (MFI) of CD4 <sup>+</sup> T cells                               |
| Mito Tracker Green (MFI) of CD8 <sup>+</sup> T cells                               |
| p-Akt (MFI) of CD8 <sup>+</sup> T cells                                            |
| p-mTOR (MFI) of CD8 <sup>+</sup> T cells                                           |
| PGC-1 $\alpha$ $\beta$ (MFI) of CD8 <sup>+</sup> T cells                           |

---



# Supplementary Table S5

Metabolites showing a significant difference between responders (R) and non-responders (NR).

| Metabolites              | Time point | Changes in R relative to NR | Modality | p-value *       | Metabolites              | Ratio of two time points | Changes in R relative to NR | Modality | p-value *       |
|--------------------------|------------|-----------------------------|----------|-----------------|--------------------------|--------------------------|-----------------------------|----------|-----------------|
| Alanine                  | 1st        | higher                      | GC       | 0.0474          | Creatinine               | 2nd/1st                  | lower                       | GC       | 0.0329          |
| 4-Cresol                 | 1st        | higher                      | GC       | 0.0238          | 1,5-Anhydro-D-sorbitol   | 2nd/1st                  | higher                      | GC       | 0.0367          |
| Cysteine                 | 1st        | higher                      | GC       | 0.0474          | Cystine                  | 2nd/1st                  | higher                      | GC       | 0.0419          |
| Hippuric acid            | 1st        | higher                      | GC / LC  | 0.0062 / 0.0056 | Glutamine                | 2nd/1st                  | higher                      | LC       | 0.0114          |
| Oleic acid               | 1st        | higher                      | GC       | 0.0281          | Glycine                  | 2nd/1st                  | higher                      | LC       | 0.0095          |
| Indoxyl sulfate          | 1st        | higher                      | GC / LC  | 0.0313 / 0.0225 | Lysine                   | 2nd/1st                  | higher                      | LC       | 0.0329          |
| Ribose                   | 1st        | higher                      | GC       | 0.0081          | Pyroglutamic acid        | 2nd/1st                  | higher                      | LC       | 0.0095          |
| Unk8                     | 1st        | lower                       | GC       | 0.0273          | Taurine                  | 2nd/1st                  | lower                       | LC       | 0.0348          |
| Indoleacetate            | 1st        | higher                      | LC       | 0.018           | asy-Dimethylarginine     | 2nd/1st                  | higher                      | LC       | 0.0176          |
| Uric acid                | 1st        | higher                      | LC       | 0.0126          | AMP                      | 2nd/1st                  | lower                       | LC       | 0.0198          |
| Trans-urocanic acid      | 1st        | higher                      | LC       | 0.0498          | Isovalerylcarnitine      | 2nd/1st                  | lower                       | LC       | 0.0454          |
| Pipecolic acid           | 1st        | lower                       | LC       | 0.0252          | Hexanoylcarnitine        | 2nd/1st                  | lower                       | LC       | 0.0367          |
| N-Acetylglucosamine      | 1st        | higher                      | LC       | 0.0281          | Acetylcarnosine          | 2nd/1st                  | higher                      | LC       | 0.0264          |
| Uric acid                | 2nd        | higher                      | GC / LC  | 0.0114 / 0.0176 | Arginine                 | 2nd/1st                  | higher                      | LC       | 0.0329          |
| Indolelactic acid        | 2nd        | higher                      | GC       | 0.0387          | Citrulline               | 2nd/1st                  | higher                      | LC       | 0.0348          |
| Arabinose                | 2nd        | higher                      | GC       | 0.0186          | N-acetylorinitine        | 2nd/1st                  | higher                      | LC       | 0.0037          |
| Arabitol                 | 2nd        | higher                      | GC       | 0.0089          | 3-Hydroxybutyric acid    | 3rd/1st                  | lower                       | GC / LC  | 0.0330 / 0.0028 |
| Hippuric acid            | 2nd        | higher                      | GC       | 0.0323          | 2-Hydroxyisovaleric acid | 3rd/1st                  | lower                       | GC / LC  | 0.0040 / 0.0028 |
| Cystine                  | 2nd        | higher                      | GC       | 0.0043          | Creatinine               | 3rd/1st                  | lower                       | GC       | 0.0099          |
| Indoxyle sulfate         | 2nd        | higher                      | GC / LC  | 0.0454 / 0.0348 | Hippuric acid            | 3rd/1st                  | higher                      | GC       | 0.0016          |
| Gluconic acid            | 2nd        | higher                      | GC       | 0.0454          | Oleic acid               | 3rd/1st                  | lower                       | GC       | 0.0252          |
| Citrulline               | 2nd        | higher                      | GC / LC  | 0.0312 / 0.0122 | Acetoacetic acid         | 3rd/1st                  | lower                       | GC       | 0.0483          |
| Creatinine               | 2nd        | higher                      | LC       | 0.0198          | Ribose                   | 3rd/1st                  | lower                       | GC       | 0.0008          |
| N-Acetylaspartic acid    | 2nd        | higher                      | LC       | 0.0311          | GSSG                     | 3rd/1st                  | higher                      | LC       | 0.0367          |
| Pyroglutamic acid        | 2nd        | higher                      | LC       | 0.0064          | Tryptophan               | 3rd/1st                  | higher                      | LC       | 0.0367          |
| Trimethyllysine          | 2nd        | higher                      | LC       | 0.0408          | 2-Hydroxyglutaric acid   | 3rd/1st                  | lower                       | LC       | 0.0099          |
| Asy-Dimethylarginine     | 2nd        | higher                      | LC       | 0.0028          | Malic acid               | 3rd/1st                  | lower                       | LC       | 0.0266          |
| Sym-Dimethylarginine     | 2nd        | higher                      | LC       | 0.0078          | Quinolinic acid          | 3rd/1st                  | lower                       | LC       | 0.0407          |
| Pipecolic acid           | 2nd        | lower                       | LC       | 0.0329          | Butyrylcarnitine         | 3rd/1st                  | lower                       | LC       | 0.0043          |
| Methylhistidine          | 2nd        | higher                      | LC       | 0.0176          | Caproic acid             | 3rd/2nd                  | higher                      | GC       | 0.0408          |
| Butyrylcarnitine         | 2nd        | lower                       | LC       | 0.0101          | 4-Cresol                 | 3rd/2nd                  | higher                      | GC       | 0.0138          |
| 3-Aminoisobutyric acid   | 2nd        | higher                      | LC       | 0.0122          | Isoleucine               | 3rd/2nd                  | higher                      | GC       | 0.0408          |
| Acetylcarnosine          | 2nd        | higher                      | LC       | 0.0367          | Arabinose                | 3rd/2nd                  | lower                       | GC       | 0.0114          |
| Alanine                  | 2nd        | higher                      | LC       | 0.0348          | Ribose                   | 3rd/2nd                  | lower                       | GC       | 0.0028          |
| Arginine                 | 2nd        | higher                      | LC       | 0.0114          | GSH                      | 3rd/2nd                  | higher                      | LC       | 0.0089          |
| N-acetylorinitine        | 2nd        | higher                      | LC       | 0.0387          | GSSG                     | 3rd/2nd                  | higher                      | LC       | 0.0008          |
| 4-Cresol                 | 3rd        | higher                      | GC       | 0.0023          | 3-OH-Kynurenine          | 3rd/2nd                  | lower                       | LC       | 0.0408          |
| 3-Hydroxyisovaleric acid | 3rd        | lower                       | GC / LC  | 0.0213 / 0.0119 | Hippuric acid            | 3rd/2nd                  | higher                      | LC       | 0.0165          |
| Pyruvic acid             | 3rd        | lower                       | GC       | 0.0348          | Isobutyrylcarnitine      | 3rd/2nd                  | higher                      | LC       | 0.0095          |
| α-ketoglutaric acid      | 3rd        | lower                       | GC       | 0.0238          |                          |                          |                             |          |                 |
| Hippuric acid            | 3rd        | higher                      | GC / LC  | 0.0002 / 0.0003 |                          |                          |                             |          |                 |
| Cystine                  | 3rd        | higher                      | GC       | 0.0201          |                          |                          |                             |          |                 |
| Indoxyl sulfate          | 3rd        | higher                      | GC / LC  | 0.0049 / 0.0011 |                          |                          |                             |          |                 |
| Unk13                    | 3rd        | higher                      | GC       | 0.0451          |                          |                          |                             |          |                 |
| GSSG                     | 3rd        | higher                      | LC       | 0.0068          |                          |                          |                             |          |                 |
| Uric acid                | 3rd        | higher                      | LC       | 0.0348          |                          |                          |                             |          |                 |
| 2-Hydrobutyric acid      | 3rd        | lower                       | LC       | 0.0281          |                          |                          |                             |          |                 |
| Pipecolic acid           | 3rd        | lower                       | LC       | 0.0348          |                          |                          |                             |          |                 |
| Butyrylcarnitine         | 3rd        | lower                       | LC       | 0.0015          |                          |                          |                             |          |                 |

\*: p-value for distinction between R and NR (Wilcoxon rank sum test).

# Supplementary Table S6

Cellular markers showing a significant difference between responders (R) and non-responders (NR).

| Cellular markers                                                             | Time point<br>or<br>ratio of two time points | Changes in R<br>relative to NR | p-value* |
|------------------------------------------------------------------------------|----------------------------------------------|--------------------------------|----------|
| % of CD4 <sup>+</sup> T cells among PBMC                                     | 2nd                                          | higher                         | 0.0107   |
| % of CD4 <sup>+</sup> T cells among PBMC                                     | 2nd/1st                                      | higher                         | 0.0001   |
| % of CD8 <sup>+</sup> T cells among PBMC                                     | 2nd                                          | higher                         | 0.0478   |
| % of CD8 <sup>+</sup> T cells among PBMC                                     | 2nd/1st                                      | higher                         | 0.0348   |
| % of Tnaive among CD8 <sup>+</sup> T cells                                   | 2nd/1st                                      | higher                         | 0.0176   |
| % of Tcm among CD4 <sup>+</sup> T cells                                      | 2nd/1st                                      | higher                         | 0.0095   |
| % of Tcm among CD8 <sup>+</sup> T cells                                      | 2nd/1st                                      | higher                         | 0.0138   |
| % of Tem among CD8 <sup>+</sup> T cells                                      | 3rd/1st                                      | higher                         | 0.0213   |
| % of Temra among CD4 <sup>+</sup> T cells                                    | 2nd/1st                                      | lower                          | 0.0107   |
| % of Temra among CD4 <sup>+</sup> T cells                                    | 3rd/2nd                                      | higher                         | 0.0081   |
| % of Temra among CD8 <sup>+</sup> T cells                                    | 2nd/1st                                      | lower                          | 0.0009   |
| Mito SOX CD8/CD4                                                             | 1st                                          | higher                         | 0.0028   |
| Mito SOX CD8/CD4                                                             | 2nd                                          | higher                         | 0.0089   |
| Mito SOX CD8/CD4                                                             | 3rd                                          | higher                         | 0.018    |
| Mito SOX CD8/CD4                                                             | 3rd/1st                                      | lower                          | 0.019    |
| Mito mass CD8/CD4                                                            | 1st                                          | higher                         | 0.0451   |
| Mito mass CD8/CD4                                                            | 3rd                                          | higher                         | 0.0348   |
| PGC-1 $\alpha$ $\beta$ (MFI) of CD8 <sup>+</sup> T cells                     | 2nd                                          | lower                          | 0.0176   |
| PGC-1 $\alpha$ $\beta$ (MFI) of CD8 <sup>+</sup> T cells                     | 2nd/1st                                      | lower                          | 0.0052   |
| PGC-1 $\alpha$ $\beta$ (MFI) of CD8 <sup>+</sup> T cells                     | 3rd/2nd                                      | higher                         | 0.0001   |
| % of PD-1 <sup>high</sup> among CD8 <sup>+</sup> T cells                     | 1st                                          | lower                          | 0.013    |
| % of FoxP3 <sup>low</sup> CD45RA <sup>+</sup> among CD4 <sup>+</sup> T cells | 1st                                          | lower                          | 0.027    |
| % of T-bet <sup>high</sup> among CD4 <sup>+</sup> T cells                    | 3rd/1st                                      | higher                         | 0.03     |
| % of T-bet <sup>low</sup> among CD4 <sup>+</sup> T cells                     | 3rd/1st                                      | higher                         | 0.0214   |
| % of T-bet <sup>+</sup> among CD8 <sup>+</sup> T cells                       | 3rd/2nd                                      | higher                         | 0.0295   |
| % of T-bet <sup>+</sup> EOMES <sup>+</sup> among CD8 <sup>+</sup> T cells    | 3rd/2nd                                      | higher                         | 0.0408   |

\*: p-value for distinction between R and NR (Wilcoxon rank sum test).

# Supplementary Table S7

AUC value of each marker in pretreatment.

| <b>Marker name</b>                                       | <b>Time point</b> | <b>Area under the curve (AUC)</b> | <b>number of patients analyzed</b> |
|----------------------------------------------------------|-------------------|-----------------------------------|------------------------------------|
| Mito SOX CD8/CD4                                         | 1 <sup>st</sup>   | 0.75                              | 47                                 |
| % of PD-1 <sup>high</sup> among CD8 <sup>+</sup> T cells | 1 <sup>st</sup>   | 0.71                              | 47                                 |
| PD-L1 TPS                                                | 1 <sup>st</sup>   | 0.66                              | 31                                 |

# Supplementary Table S8

Equation of LDA for each marker combination.

| Marker combination         | Before the adaptation                                                                                                                                                                                                                                                          | After the adaptation                                                                                                                                                                                                                                                           |
|----------------------------|--------------------------------------------------------------------------------------------------------------------------------------------------------------------------------------------------------------------------------------------------------------------------------|--------------------------------------------------------------------------------------------------------------------------------------------------------------------------------------------------------------------------------------------------------------------------------|
| Metabolite combination I   | $9.92 \times [\text{Cysteine 1st}] - 44.7 \times [\text{Unk8 (1st)}]$<br>$+ 5.41 \times 10^{-7} \times [\text{Hippuric acid (1st)}] - 1.50$                                                                                                                                    | $9.92 \times [\text{Cysteine 1st}] - 44.7 \times [\text{Unk8 (1st)}]$<br>$+ 5.41 \times 10^{-7} \times [\text{Hippuric acid (1st)}] - 1.46$                                                                                                                                    |
| Metabolite combination II  | $207 \times [\text{Arabinose (2nd)}] + 3.17 \times 10^{-7} \times [\text{Arginine (2nd)}]$<br>$- 3.77 \times 10^{-7} \times [\text{Butyrylcarnitine (2nd)}] - 1.99$                                                                                                            | $207 \times [\text{Arabinose (2nd)}] + 3.17 \times 10^{-7} \times [\text{Arginine (2nd)}]$<br>$- 3.77 \times 10^{-7} \times [\text{Butyrylcarnitine (2nd)}] - 1.96$                                                                                                            |
| Metabolite combination III | $4.43 \times 10^{-7} \times [\text{Hippuric acid (1st)}] + 12.1 \times [\text{Cystine (2nd)}]$<br>$+ 3.55 \times 10^{-5} \times [\text{GSSG (3rd)}]$<br>$- 8.81 \times 10^{-8} \times [\text{Butyrylcarnitine 3rd}] - 2.71$                                                    | $4.43 \times 10^{-7} \times [\text{Hippuric acid (1st)}] + 12.1 \times [\text{Cystine (2nd)}]$<br>$+ 3.55 \times 10^{-5} \times [\text{GSSG (3rd)}]$<br>$- 8.81 \times 10^{-8} \times [\text{Butyrylcarnitine 3rd}] - 2.67$                                                    |
| Cellular combination I     | $-0.302 \times [\% \text{ of PD-1high among CD8+ T cells (1st)}]$<br>$+ 2.95 \times [\text{Mito SOX CD8/CD4(1st)}] - 1.91$                                                                                                                                                     | $-0.302 \times [\% \text{ of PD-1high among CD8+ T cells (1st)}]$<br>$+ 2.95 \times [\text{Mito SOX CD8/CD4(1st)}] - 1.87$                                                                                                                                                     |
| Cellular combination II    | $-0.252 \times [\% \text{ of PD-1high among CD8+ T cells (1st)}]$<br>$+ 3.58 \times [\text{Mito SOX CD8/CD4(1st)}]$<br>$- 1.22 \times [\text{PGC-1}\alpha\beta \text{ of CD8+ T cells (2nd/1st)}]$<br>$+ 1.93 \times [\% \text{ of CD4+ T cells among PBMC (2nd/1st)}] - 3.35$ | $-0.252 \times [\% \text{ of PD-1high among CD8+ T cells (1st)}]$<br>$+ 3.58 \times [\text{Mito SOX CD8/CD4(1st)}]$<br>$- 1.22 \times [\text{PGC-1}\alpha\beta \text{ of CD8+ T cells (2nd/1st)}]$<br>$+ 1.93 \times [\% \text{ of CD4+ T cells among PBMC (2nd/1st)}] - 3.30$ |
| Cellular combination III   | $-0.281 \times [\% \text{ of PD-1high among CD8+ T cells (1st)}]$<br>$+ 3.30 \times [\text{Mito SOX CD8/CD4(1st)}]$<br>$+ 2.00 \times [\text{PGC-1}\alpha\beta \text{ of CD8+ T cells (3rd/2nd)}]$<br>$+ 1.55 \times [\% \text{ of CD4+ T cells among PBMC (2nd/1st)}] - 6.04$ | $-0.281 \times [\% \text{ of PD-1high among CD8+ T cells (1st)}]$<br>$+ 3.30 \times [\text{Mito SOX CD8/CD4(1st)}]$<br>$+ 2.00 \times [\text{PGC-1}\alpha\beta \text{ of CD8+ T cells (3rd/2nd)}]$<br>$+ 1.55 \times [\% \text{ of CD4+ T cells among PBMC (2nd/1st)}] - 5.97$ |
